# Supplementary material for: Toward Machine-Learning-Based Decision Support in Diabetes Care: A Risk Stratification Study on Diabetic Foot Ulcer and Amputation
Source: Frontiers journal article supplement (doi:10.3389/fmed.2020.601602), 2021-02-18
Supplement: Data_Sheet_1.pdf [file Data_Sheet_1.pdf]

## 1 APPENDIX

### 1.1 Codes

In this section all ICD-10 and ATC codes that have been used in this study are tabulated.

| Medical Condition      | ICD-10 codes                   |
|------------------------|--------------------------------|
| Diabetes Type I        | DE10                           |
| Diabetes Type II       | DE11                           |
| Diabetes*              | DE (10-14)                     |
| Foot ulcer             | DE(10-14)5B, DL89, DL97, DL984 |
| Above knee amput (aka) | KNFQ (09,19,99)                |
| Below knee amput (bka) | KNGQ(09,19,99)                 |
| Toe amput (ta)         | KNHQ(1,2,11,14,17,20-25,27,99) |
| Foot amput (fa)        | KNHQ (00,02,03,05,07)          |
| Amputation             | aka, bka, ta, fa               |

**Table 2.** The ICD-10 codes used for determining diabetic patients in this study. We take all different diabetes types which is the list of codes in Diabetes\*.

| Medical Conditions         | ICD-10 codes                                                  |
|----------------------------|---------------------------------------------------------------|
| Cardiovascular diseases    | DI 20-25, DE105, DE115, DE125, DE135, DE145                   |
| Peripheral Artery diseases | DI73 (with all its subexpansions)                             |
| Hyperlipidemia             | DE(780-786)                                                   |
| Hypertension               | DI1 (with all its subexpansions)                              |
| Nervous system disorder    | DG (with all its subexpansions)                               |
| Chronic Renal Complication | DN18(1-9) and DE(10-14)2                                      |
| Neuropathy                 | DE104, DE114, DE124, DE134, DE144, DG730, DG990, DG590, DG632 |
| Retinopathy                | DE103, DE113, DE123, DE133, DE143                             |
| Mental diseases            | DF (with all its subexpansions)                               |
| Dementia with Alzheimer    | DF00 ( with all its subexpansions)                            |
| Periodic Depression        | DF33 ( with all its subexpansions)                            |
| Urinary tract infection    | DN109, DN300, DN309, DN390                                    |
| Bone fracture              | DS(0-9)2, DT0(2,8,10,12), DM483, DM484, DM485, DM843          |

**Table 3.** The ICD-10 codes of different medical conditions that have been assessed in this study.

| Medication Type            | ATC codes                  |
|----------------------------|----------------------------|
| Diabetes                   | A10AB, A10BD, A10BX, A10BB |
| Cholesterol lowering drugs | C10AA                      |

**Table 4.** ATC codes used in this study.

## 1.2 Predictor model

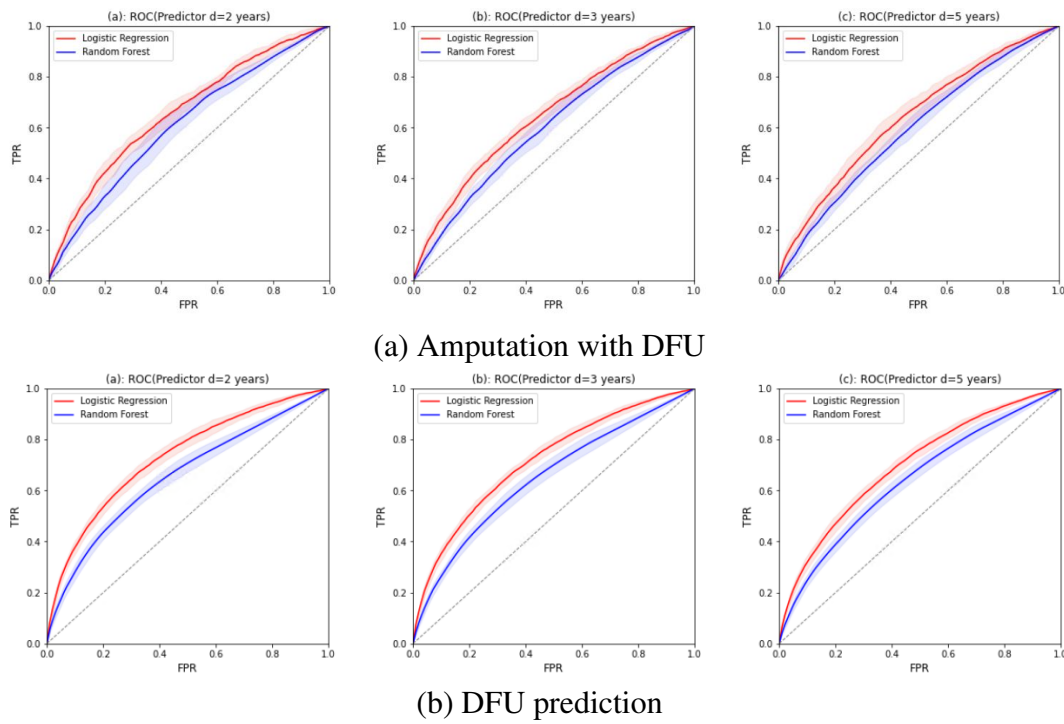

**Figure 10.** ROC curves for prediction of (a) amputation for patients that have DFU in the next  $d = 2, 3, 5$  years since the target year and (b) DFU occurrence.

### 1.3 Log hazard ratios

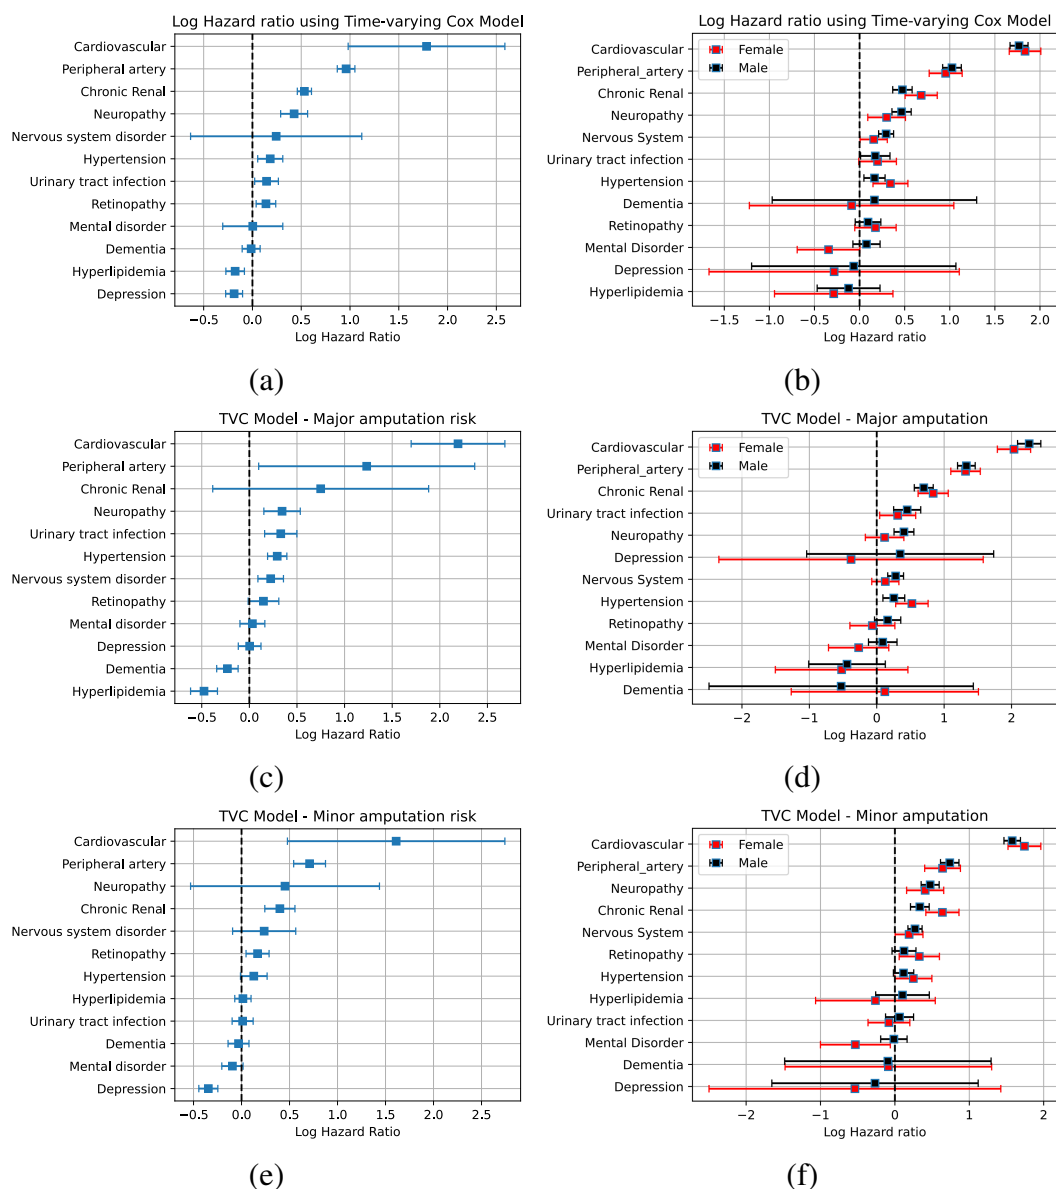

**Figure 11.** Plots (a,b): risk of amputation for patients who have foot ulcer during the study timeline. Plots (c,d) and (e,f): Risk of major/minor amputation for patients with diabetes and foot ulcer respectively.

#### 1.4 Aalen Johansen Model on Medical Conditions

Figures 13 and 12 show the mortality risk and amputation for patients with diabetes who have one of the specific medical condition. Fig. show the mortality risk versus the risk of developing foot ulcer for patients with diabetes and specific medical conditions. Fig. 14 presents the risk of foot ulcer versus mortality.

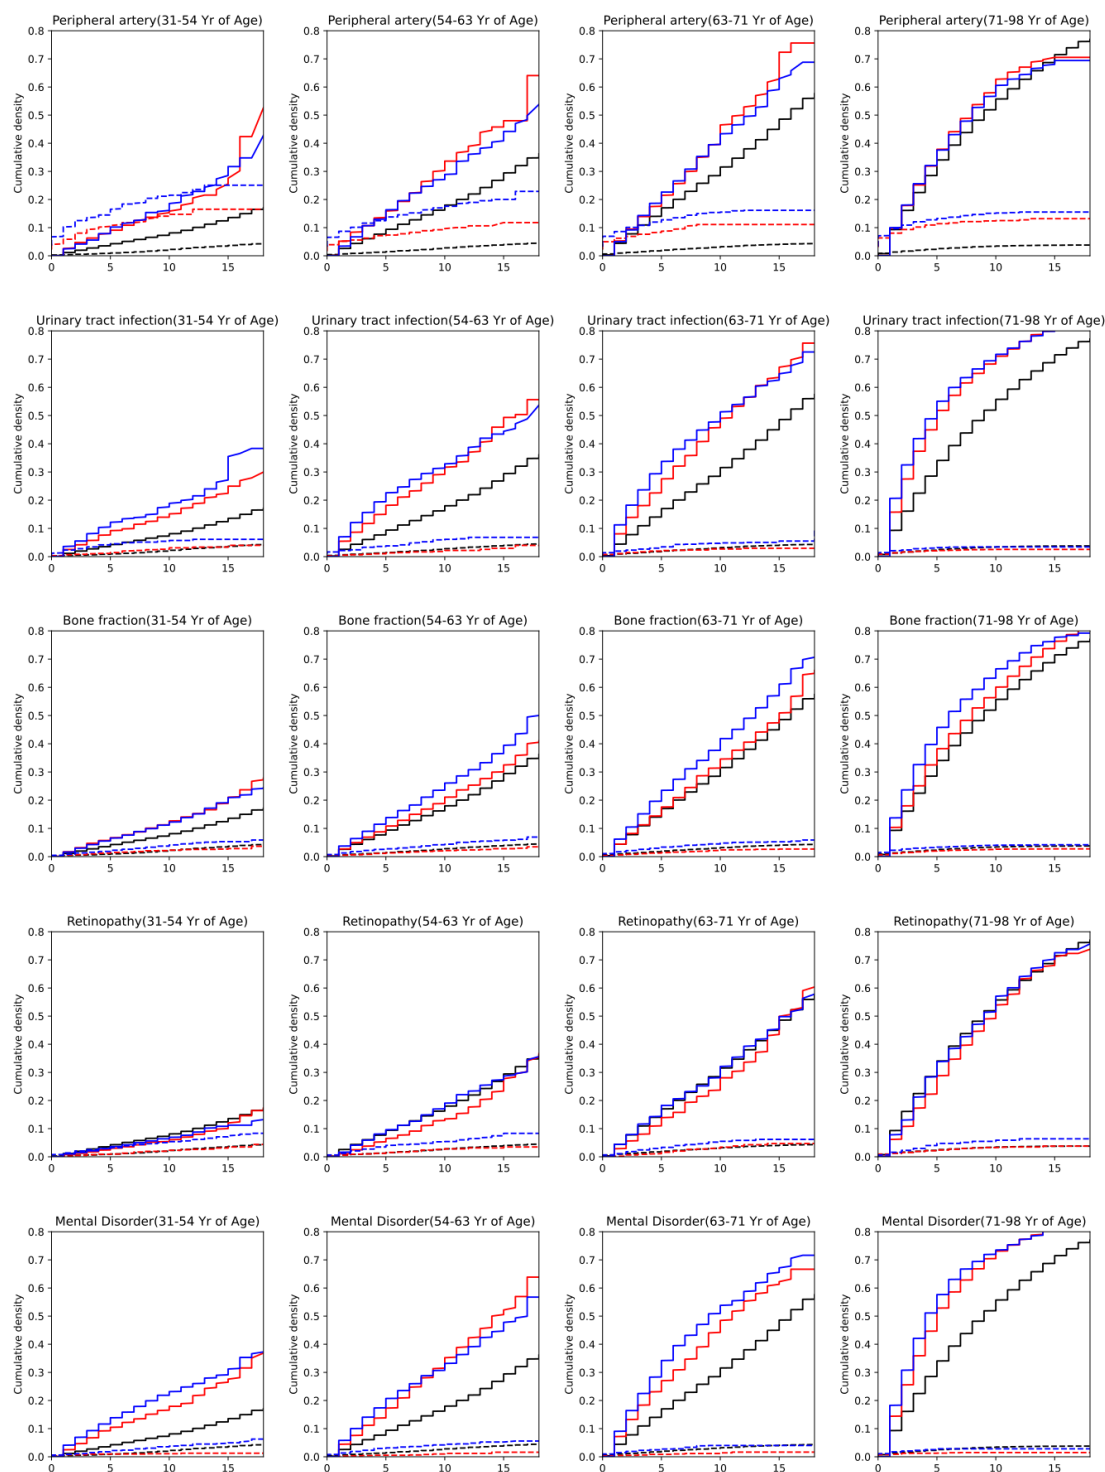

**Figure 12.** Risk of developing amputation or death having diabetes and one of the medical conditions (Hypertension, Hyperlipidemia). Red/Blue/Black dashed: (Female/Male/Baseline) risk of developing amputation. Red/Blue/Black solid: (Female/Male/Baseline) risk of death.

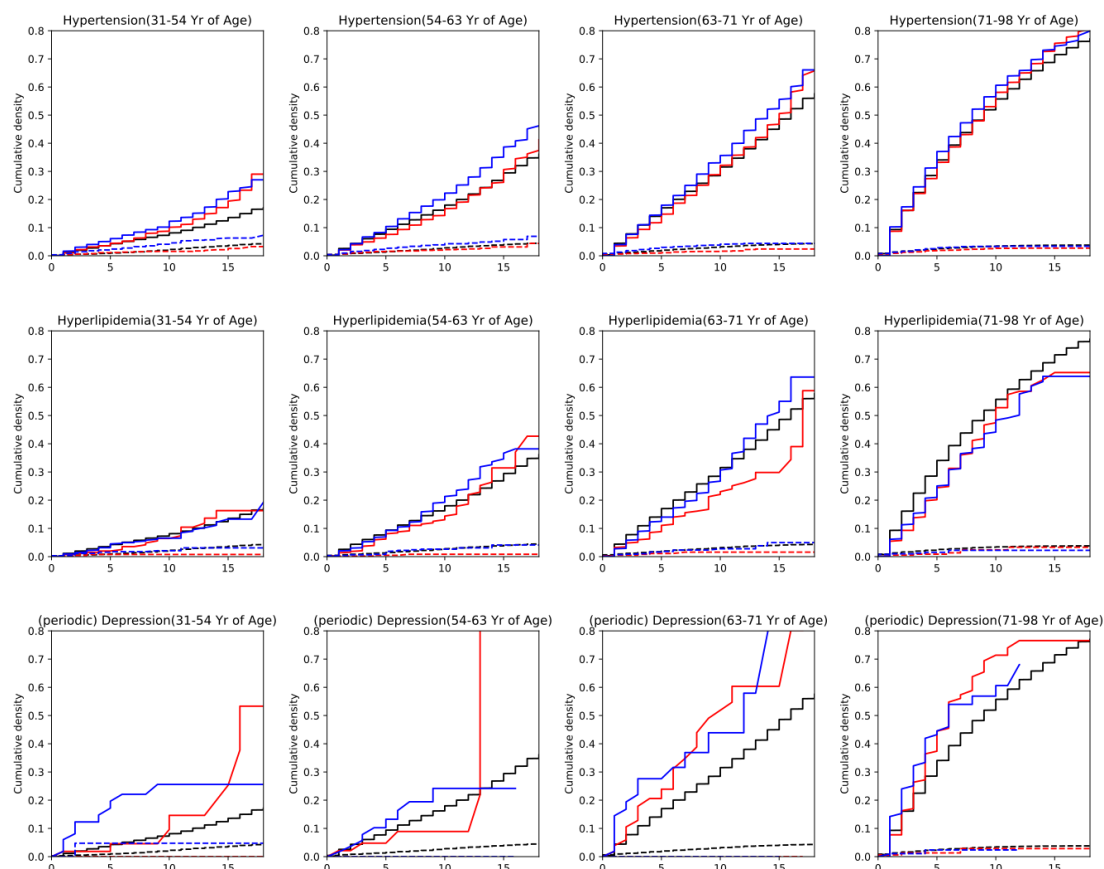

**Figure 13.** Risk of developing amputation or death having diabetes and one of the medical conditions stated in the plots. Red/Blue/Black dashed: (Female/Male/Baseline) risk of developing amputation. Red/Blue/Black solid: (Female/Male/Baseline) risk of mortality.

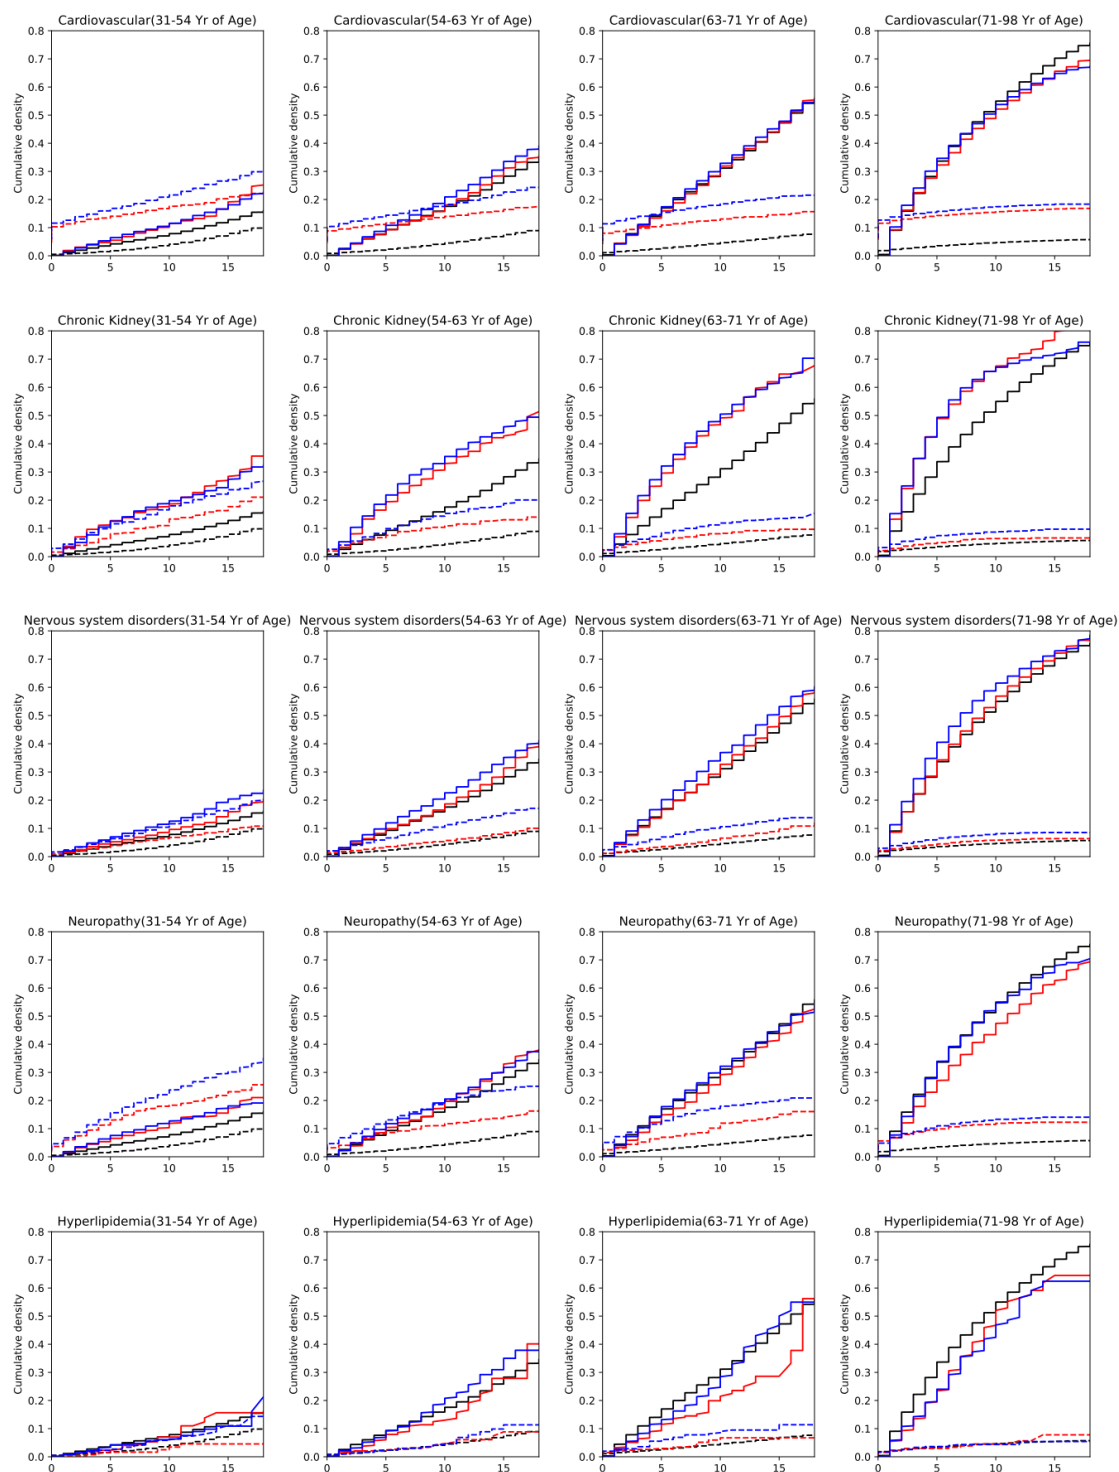

**Figure 14.** Risk of developing foot ulcer or death having diabetes and one of the medical conditions (Hypertension, Hyperlipidemia). Red/Blue/Black dashed: (Female/Male/Baseline) risk of developing foot ulcer. Red/Blue/Black solid: (Female/Male/Baseline) risk of death.
